# Supplementary material for: Recent advances in the orientation of conjugated polymers for organic field-effect transistors
Source: Royal Society of Chemistry journal article supplement (doi:10.1039/c9tc04397g), 2019-01-01
Supplement: c9tc04397g1.xlsx [file c9tc04397g1.xlsx]

## Sheet: Reference table
Reference	Material(s)	Deposition method	Average µ_h (along backbon orientation in case of orientation) (cm^2/Vs); OFET	Average µ_e (along backbon orientation in case of orientation) (cm^2/Vs); OFET	Mobility anisotropy µ_||/µ_⊥; OFET	Optical anisotropy DR	Specific comments/OFET architecture (occasionally)
9	CDT-BTZ-C16	Dip-coating	1		~ 2
71	CDT-BTZ-C20	Film Compression at surface of ionic liquid	6.8				To avoid contact resistance, hole mobility (>10 cm^2/V.s) was also measured using four terminal measurement in linear regime.
114	CDT-BTZ-C16	Solution shearing on nanogroved substrate	~ 0.3		> 1		BG/BC
167	CDT-BTZ-C16	Directional Solvent Evaporation on Nanostructured Substrate	18.5		17.6		Capillary force was also utilized to assist orientation.
79	DPP-BTz	Solution shearing with flexible coating head	6.7		~ 3	~ 14
180	DPP-BTz	Dynamic-template-directed orientation	7.2		~ 2		The Ion Gel was utilised as template for film coating and dielectric layer for OFET as well.
116	DPPDTSE/SEBS CONPHINE	Solution shearing with a patterned microtrench coating blade	1.5			> 1.4	Fully stretchable OFET
122	DPPT-TT	Wire Bar Coating	1.64
123	DPPT-TT	Wire Bar Coating	1.78	0.11			Lower film thickness then that in Ref.122.
129	DPPT-TT	Off-Center Spin Coating	2.05		5.86	1.17	TG/BC (orientation was mainly limited to few top layers)
130	DPPT-TT	Off-Center Spin Coating	4.72		8.28	4.3	Preaggrigated solution was formed in high boiling point and relatively poor solvent.
133	DPPT-TT	Rotation coating	1.45		4.83	3.97	film formation of conjugated polymer chains during off-center spin-coating.
179	DPPT-TT	Dynamic-template-directed orientation	2.24		~ 3		At lower film thickness higher value of DR was obltained but due to mechanical damages during film transfer to the substrate led to hampered mobility.
96	F4BDOPV-2T	Dip-coating	1.17
131	IDT-BT	Off-Center Spin Coating	1.38		> 1	~ 1	Preaggrigation in solution was developed using a binary solvent system.
141	NR-P3HT	Floating film transfer method	0.003		~ 5.2	8.3
57	P(NDI2OD-T2)	Mechanical rubbing		0.11	~7
95	P(NDI2OD-T2)	Dip-coating		0.043			BG/TC. The SiO_2 surface was plasma treated only.
77	P(NDI2OD-T2)	Wire Bar Coating		4.1	> 10
123	P(NDI2OD-T2)	Wire Bar Coating	0.0175	0.34
127	P(NDI2OD-T2)	Off-Center Spin Coating		2.6			The polymer was of defect-free nature nature
129	P(NDI2OD-T2)	Off-Center Spin Coating		1	9	1.04	TG/BC (orientation was mainly limited to few top layers)
129	P18	Off-Center Spin Coating	5.66		37.7	1.07	TG/BC (orientation was mainly limited to few top layers)
74	P2TDC17FT4	Solution shearing	0.096				BG/TC. PTS treated SiO_2.
45	P3DDT	Friction transfer	0.0007		8	> 10	Due to face-on conformation of CPs the insulating sidechains lies in planne causing hampered inplane charge transport.
16	P3HT	Directional Epitaxial Crystallization	> 0.01		> 10
54	P3HT	Mechanical rubbing	> 0.001		~ 2	5.1
55	P3HT	Mechanical rubbing	~ 0.0003		22	> 8	The noted data is for lowere molecular weight sample (6.4 kDa). With increase in molecular weight the over mobility increased but anisotropy decreased.
66	P3HT	Strain allignment	~ 0.1		9	5	The noted mobility was obtained for lower channel length, 5 µm.
101	P3HT	Blade Coating	~ 0.2		1.62	> 3.5
109	P3HT	Solution shearing	0.056		~ 1	~ 1.6	BG/TC. 0.056 (FOTS-8), 0.004 (OTS-8) : both for 51 kDa sample. For 24 kDa P3HT sample: 0.011 (FOTS-8), 0.003 (OTS-8) cm^2/V.s
113	P3HT	Solution shearing with nanogrooved coating head	0.005
121	P3HT/polyethylene blend	Wire Bar Coating	0.05
124	P3HT	Wire Bar Coating	0.004		1.52	1.48	P3HT: 36 kDa.
129	P3HT	Off-Center Spin Coating	0.088		1.01	1
133	P3HT	Rotation coating	0.06		1.2	1	TG/BC
143	P3HT	Floating film transfer method	6.3			~ 2.5	The improvement in mobility was 5 times and the P3HT utilized was defect free type.
56	PBTTT	Mechanical rubbing	0.02		13.33	13	The lower mobility was obtained inspite of highly oriented film because this method is not compatible with hydrophobic substrate.
69	PBTTT	Strain allignment	1.52		~ 4.6	~ 2.5	At higher strain DR increased but mobility desreased due to crystalline nature of PBTTT, breaks in the film occurred on application of higher strain.
70	PBTTT	Film Compression at surface of ionic liquid	0.4		~ 5.3	15.6
78	PBTTT	Dip-coating	0.7		> 10		The SiO_2 substrate was untreated and The films were annealed far below liquid crystalline temperature.
74	PBTTT	Solution shearing	0.015				BG/TC. PTS treated SiO_2.
142	PBTTT	Floating film transfer method	0.4		10	up to 13	The maximum mobility reached up to 1.24 cm^2/V.s
114	PCDTPT	Solution shearing on nanogroved substrate	> 5.5		> 1		BG/BC
162	PCDTPT	Directional Solvent Evaporation on Nanostructured Substrate	~ 6		~ 6	2	High Molecular weight (300kDa) sample was utilized.
164	PCDTPT	Directional Solvent Evaporation on Nanostructured Substrate	56.1				Directionally aligned PCDTPT thin films were doped by iodine vapor treatment.
167	PCDTPT	Directional Solvent Evaporation on Nanostructured Substrate	21.3		13.6		Capillary force was also utilized to assist orientation.
145	PDPP-TNT	Floating film transfer method	1.2			~ 2
80	PFIBI-BT	Wire Bar Coating	5.1	4.2	> 3
43	PTB	Friction transfer	0.006		10-1000	8	Annealing of the film at higher temperature led to conformational change in the film and mobility anisotropy decreased.
113	PTDPP-DTTE	Solution shearing with nanogrooved coating head	6.75
113	PTDPP-DTTE	solution shearing	4.53
112	PTDPPTFT4	Solution shearing	3.13				Environment friendly film fabrication approach.
85	PTDPPSe	Solution shearing	2.48	0.35			Preaggregation in solution was present.
86	PTDPPSe-SiC4	solution shearing	5.12	1.39			Preaggregation in solution was present.
86	PTDPPSe-SiC5	Solution shearing	5.66	1.75			Preaggregation in solution was present.
85, 86	PTDPPSe-SiC6	Solution shearing	3.48	0.97			Preaggregation in solution was present.
112	PTDPPTFT4	Solution shearing	3.13
122	PTVPhI-Eh	Wire Bar Coating	0.24	0.008			TG/BC. Au electrode.
122	PTVPhI-Eh	Wire Bar Coating	0.078	0.23			TG/BC. CsF/Au electrode.
63	PQT	Roll Transfer	0.17		8	> 2	The same grooup also reported the maximum mobility of 0.21 cm^2/Vs along 30^o away from the backbone direction (Ref. 64).
160	PQT	Floating film transfer method	0.026		10.4	22
168	regioregular-CDT-FBT	Directional Solvent Evaporation on Nanostructured Substrate	8.18				Capillary force and gravitational force were also utilized to assist orientation. Mobility improved >13 times compared to spincoated films.
168	regiorandom-CDT-FBT	Directional Solvent Evaporation on Nanostructured Substrate	16.04				Capillary force and gravitational force were also utilized to assist orientation. Mobility improved >13 times compared to spincoated films.
DR : Dichroic Ratio		OFET : Orfanic field effect transistor	µ_h : hole mobility		µ_e : electron mobility
